# Supplementary material for: Entropy-ruled nonequilibrium charge transport in thiazolothiazole-based molecular crystals: a quantum chemical study
Source: Royal Society of Chemistry journal article supplement (doi:10.1039/d3cp05739a), 2024-01-01
Supplement: d3cp05739a1.pdf [file d3cp05739a1.pdf]

## Supplementary Information

### Entropy-Ruled Nonequilibrium Charge Transport in Thiazolothiazole-Based Molecular Crystals: A Quantum Chemical Study

M. Pavalamuthu and K. Navamani\*

Department of Physics, Centre for Research and Development (CFRD)  
KPR Institute of Engineering and Technology  
Coimbatore – 641407, India

\*Corresponding author: [pranavam5q@gmail.com](mailto:pranavam5q@gmail.com)

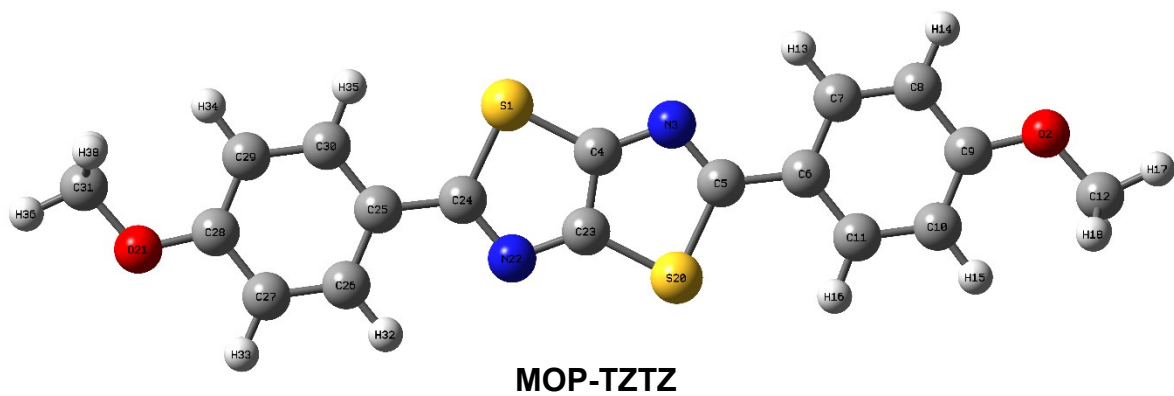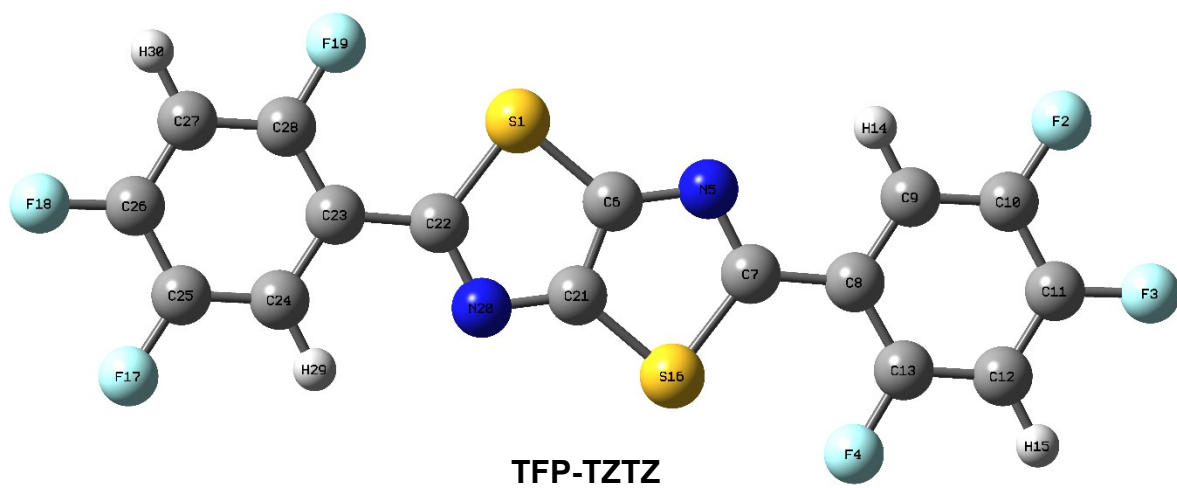

**Fig. S1** Optimized molecular structures of MOP-TZTZ and TFP-TZTZ.

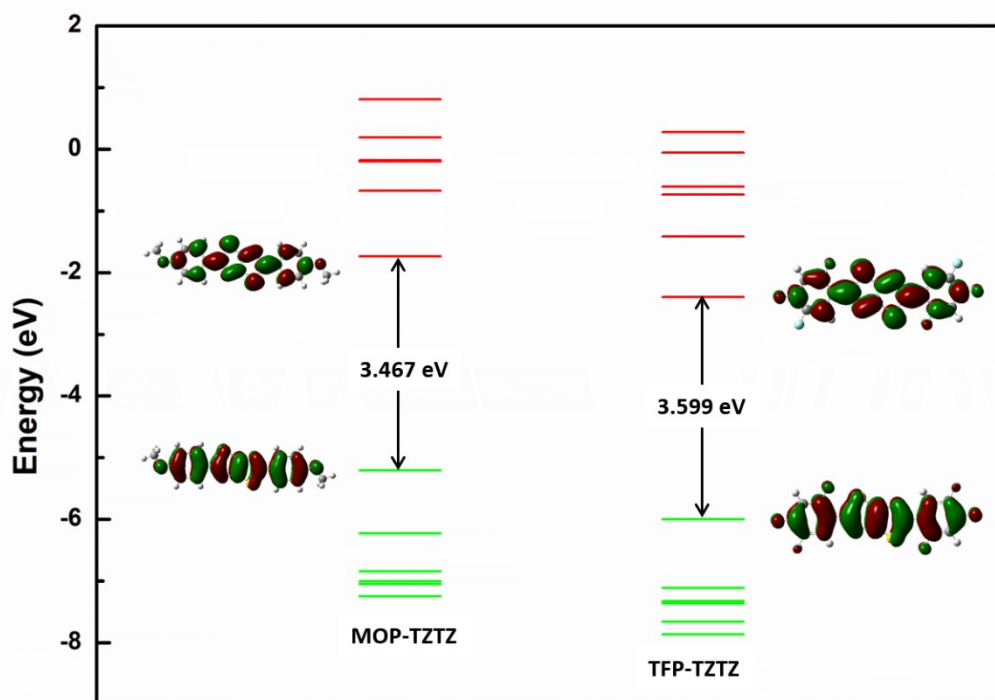

**Fig. S2** Energy levels (HOMO and LUMO) diagram of MOP-TZTZ and TFP-TZTZ molecules and their corresponding energy gap.

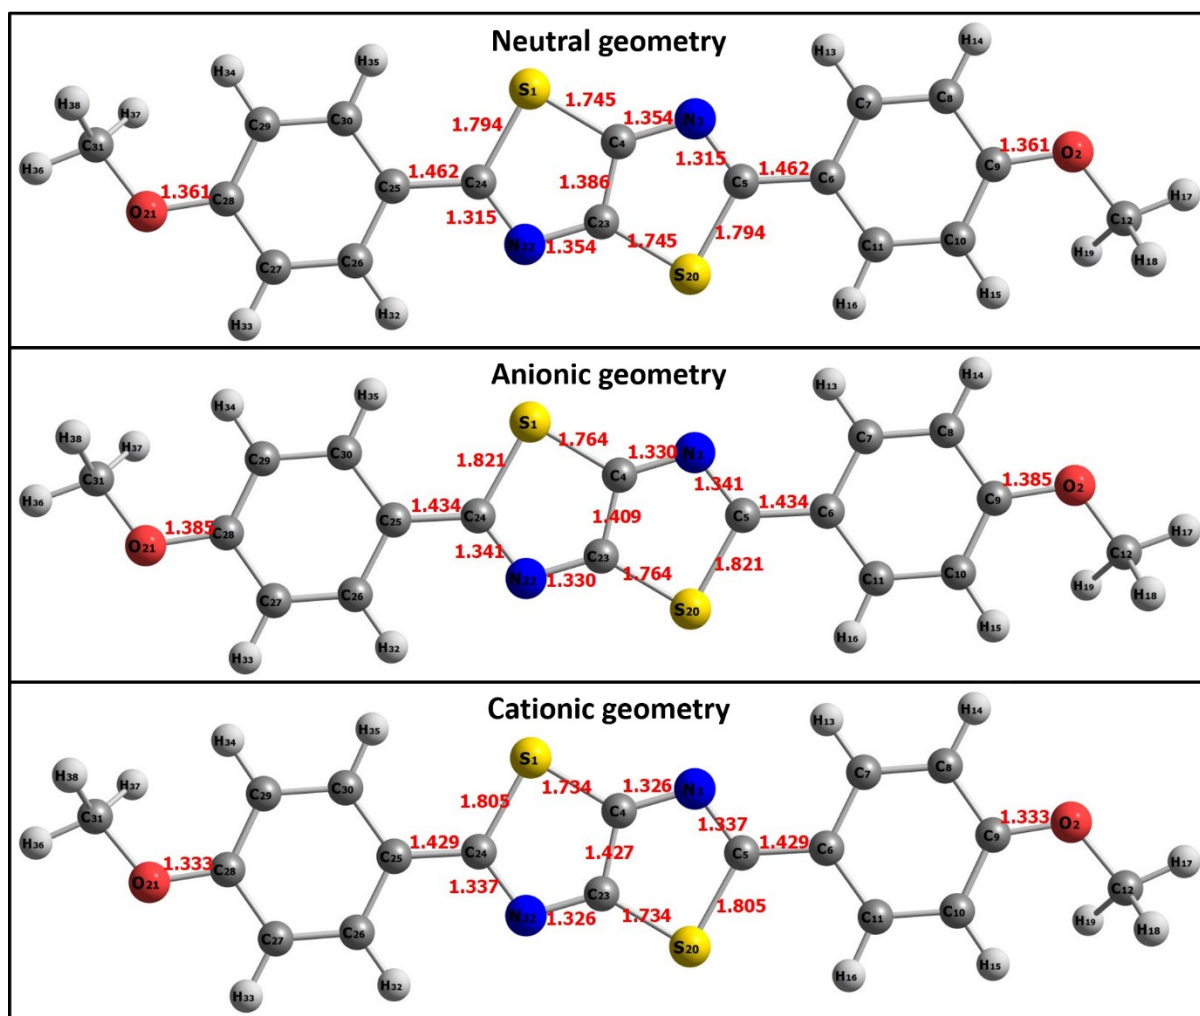

**Fig. S3** Calculated bond lengths, in Å, of MOP-TZTZ in optimized neutral, anionic, and cationic geometries for selected atomic specifications.

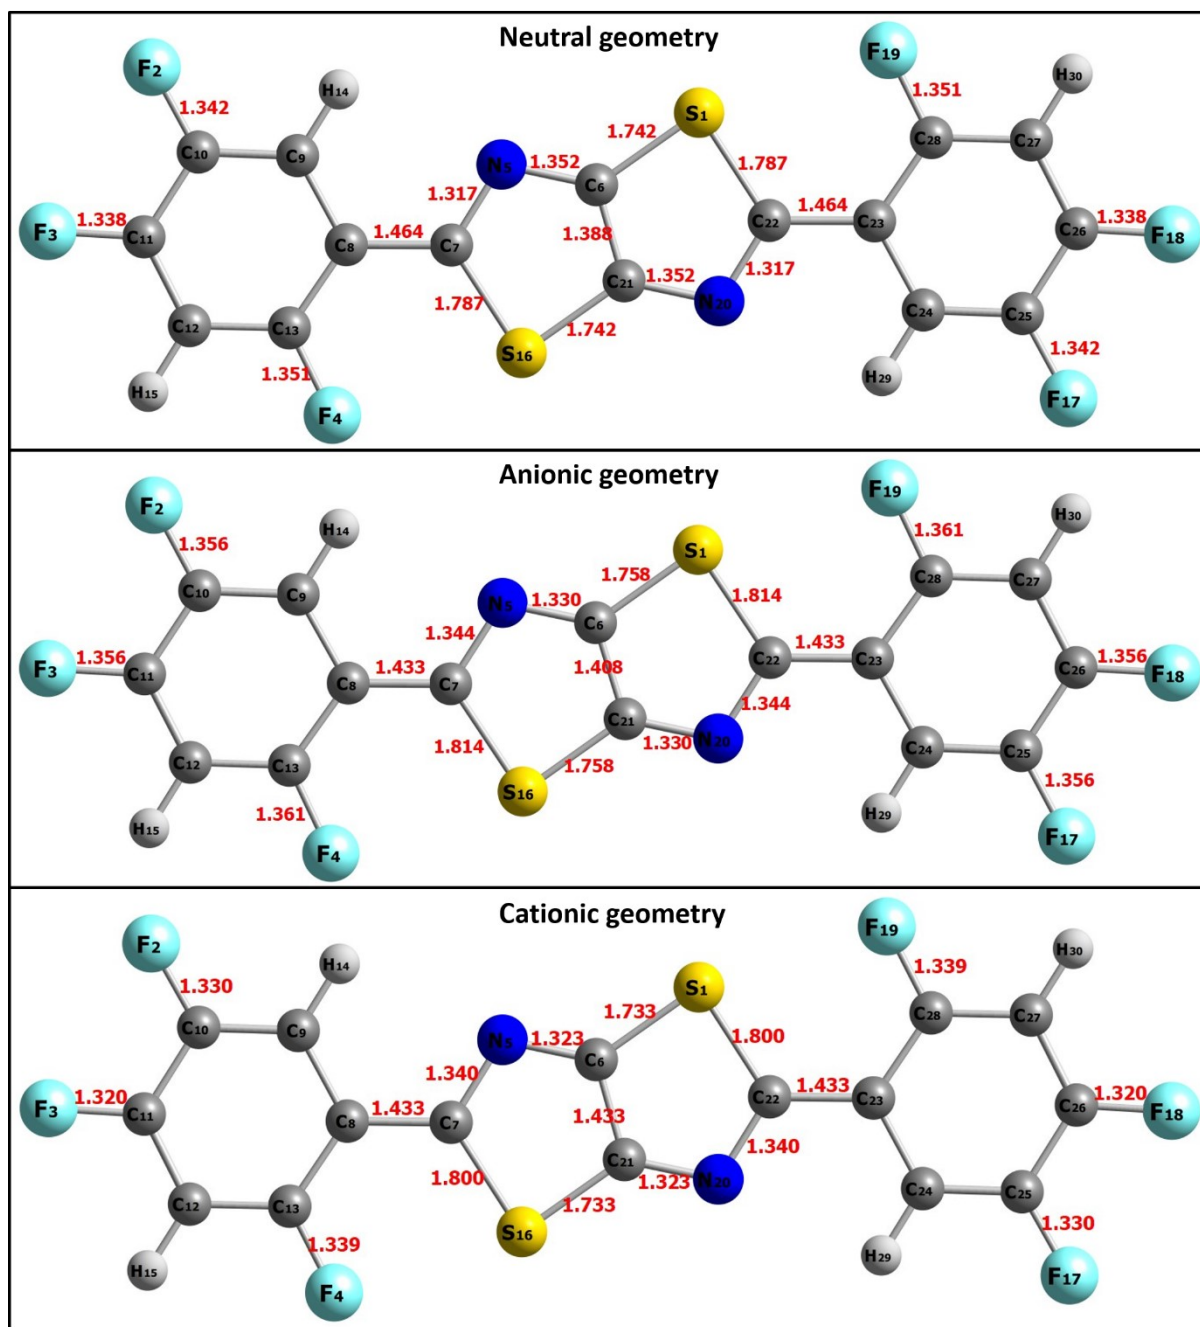

**Fig. S4** Calculated bond lengths, in Å, of TFP-TZTZ in optimized neutral, anionic, and cationic geometries for selected atomic specifications.

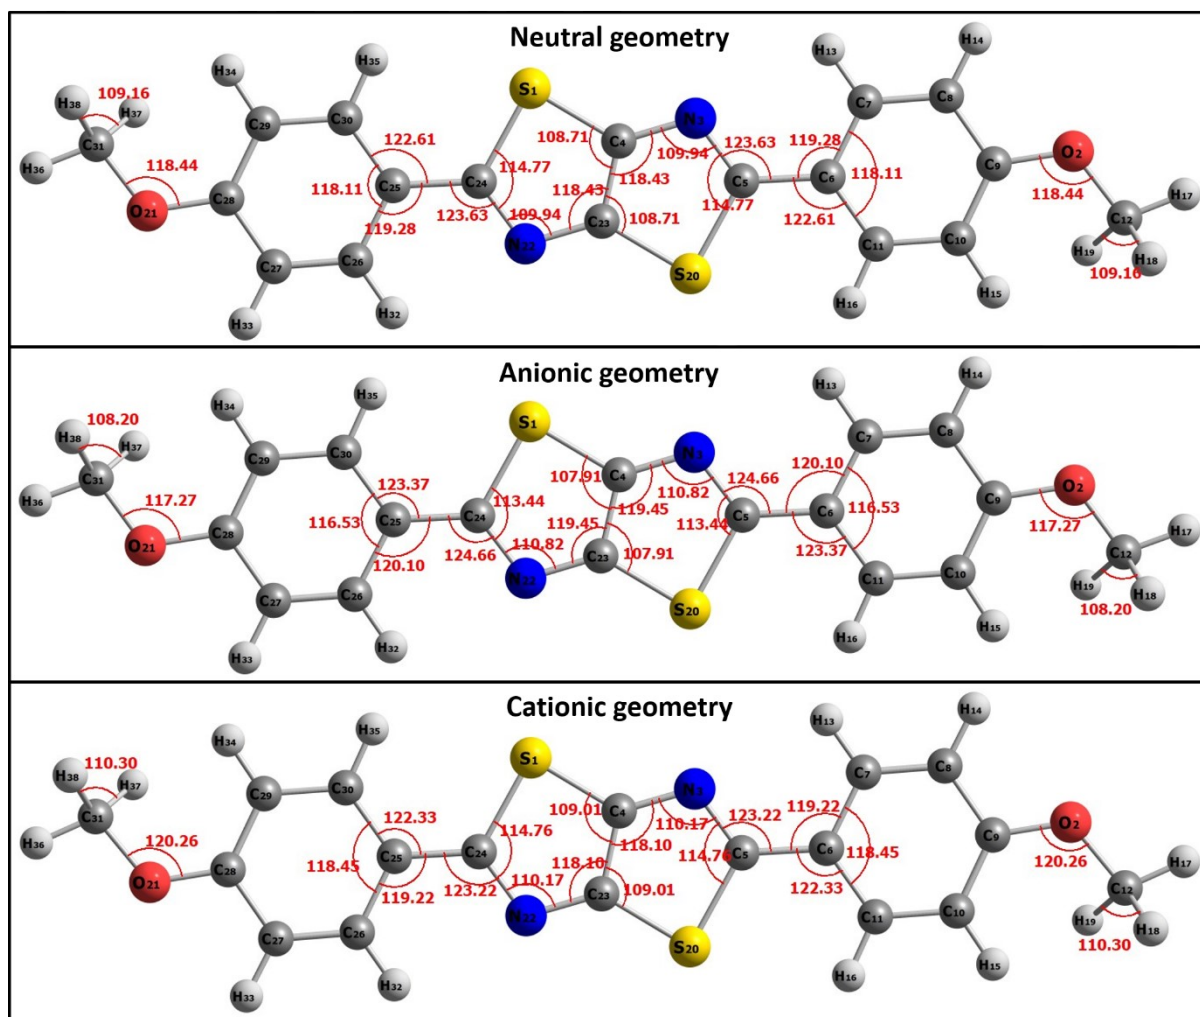

**Fig. S5** Calculated bond angles, in degree, of MOP-TZTZ in optimized neutral, anionic, and cationic geometries for selected atomic specifications.

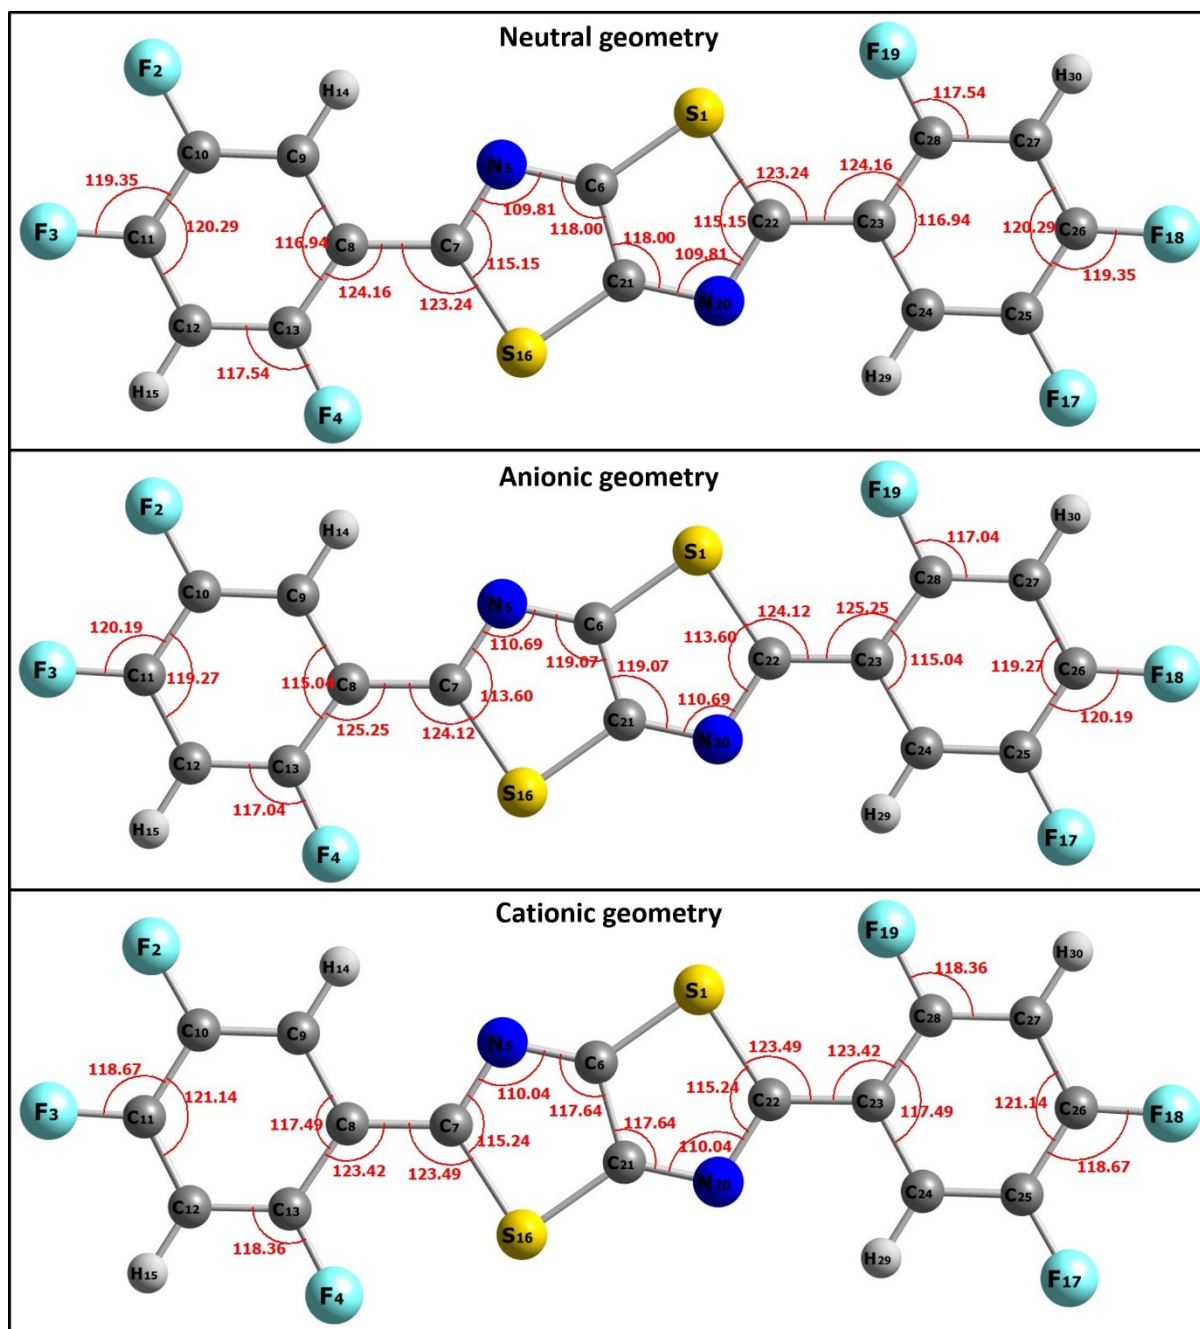

**Fig. S6** Calculated bond angles, in degree, of TFP-TZTZ in optimized neutral, anionic, and cationic geometries for selected atomic specifications.

| Molecule | Atomic specification | Torsion angle (degree) |           |           |
|----------|----------------------|------------------------|-----------|-----------|
|          |                      | Neutral                | Anionic   | Cationic  |
| MOP-TZTZ | N3-C5-C6-C7          | -0.5963                | -0.0888   | -0.125    |
|          | N3-C5-C6-C11         | 179.4322               | 179.9305  | 179.9255  |
|          | S20-C5-C6-C7         | 179.2807               | 179.8286  | 179.7905  |
|          | S20-C5-C6-C11        | -0.6908                | -0.1522   | -0.1591   |
|          | S1-C24-C25-C26       | -179.2807              | -179.8286 | -179.7905 |
|          | S1-C24-C25-C30       | 0.6908                 | 0.1522    | 0.1591    |
|          | N22-C24-C25-C26      | 0.5963                 | 0.0888    | 0.125     |
|          | N22-C24-C25-C30      | -179.4322              | -179.9305 | -179.9255 |
| TFP-TZTZ | N5-C7-C8-C9          | -0.1594                | -0.0719   | -0.0661   |
|          | N5-C7-C8-C13         | 179.8739               | 179.9556  | -179.9985 |
|          | S16-C7-C8-C9         | 179.741                | 179.803   | 179.8536  |
|          | S16-C7-C8-C13        | -0.2258                | -0.1695   | -0.0788   |
|          | S1-C22-C23-C24       | -179.741               | -179.803  | -179.8536 |
|          | S1-C22-C23-C28       | 0.2258                 | 0.1695    | 0.0788    |
|          | N20-C22-C23-C24      | 0.1594                 | 0.0719    | 0.0661    |
|          | N20-C22-C23-C28      | -179.8739              | -179.9556 | 179.9985  |

**Table S1** Calculated dihedral angles of the studied molecules in optimized neutral, anionic, and cationic geometries for selected atomic specifications.



| Molecule | Pair | Intermolecular distance (Å) | Electronic coupling ( $\times 10^{-3}$ eV) |          | Spatial overlap integral ( $\times 10^{-4}$ ) |          | $i^{\text{th}}$ Site energy (eV) |          | $j^{\text{th}}$ Site energy (eV) |          | Site energy difference (eV) |          |
|----------|------|-----------------------------|--------------------------------------------|----------|-----------------------------------------------|----------|----------------------------------|----------|----------------------------------|----------|-----------------------------|----------|
|          |      |                             | Hole                                       | Electron | Hole                                          | Electron | Hole                             | Electron | Hole                             | Electron | Hole                        | Electron |
| MOP-TZTZ | 13   | 10.69                       | -2.860                                     | -6.509   | 2.957                                         | 9.086    | -4.756                           | -2.416   | -5.147                           | -2.827   | -0.391                      | -0.411   |
|          | 14   | 10.69                       | -2.871                                     | -6.554   | 2.956                                         | 9.124    | -5.147                           | -2.827   | -4.756                           | -2.416   | 0.391                       | 0.411    |
|          | 23   | 10.69                       | -2.873                                     | -6.538   | 2.956                                         | 9.127    | -5.147                           | -2.827   | -4.756                           | -2.416   | 0.391                       | 0.411    |
|          | 24   | 10.69                       | -2.855                                     | -6.526   | 2.956                                         | 9.135    | -4.756                           | -2.416   | -5.147                           | -2.827   | -0.391                      | -0.411   |
|          | 34   | 18.56                       | -4.493                                     | 1.371    | 4.136                                         | -1.751   | -4.970                           | -2.618   | -4.970                           | -2.618   | 0.000                       | 0.000    |
| TFP-TZTZ | 13   | 6.07                        | -5.705                                     | 22.216   | 4.383                                         | -33.325  | -5.860                           | -3.362   | -5.860                           | -3.362   | 0.000                       | 0.000    |
|          | 23   | 17.14                       | -1.786                                     | -0.194   | 1.396                                         | -0.068   | -5.826                           | -3.320   | -5.826                           | -3.320   | 0.000                       | 0.000    |
|          | 34   | 15.84                       | -14.182                                    | 2.447    | 10.355                                        | -1.614   | -5.871                           | -3.363   | -5.871                           | -3.363   | 0.000                       | 0.000    |
|          | 35   | 6.83                        | 2.193                                      | -5.337   | -1.936                                        | 11.110   | -5.881                           | -3.373   | -5.881                           | -3.373   | 0.000                       | 0.000    |
|          | 37   | 3.74                        | 99.023                                     | 31.146   | -80.518                                       | -51.781  | -5.835                           | -3.336   | -5.835                           | -3.336   | 0.000                       | 0.000    |
|          | 47   | 16.71                       | 1.222                                      | 0.820    | -0.694                                        | -0.451   | -5.886                           | -3.377   | -5.886                           | -3.377   | 0.000                       | 0.000    |

**Table S2** Calculated electronic coupling (or) charge transfer integral, spatial overlap integral,  $i^{\text{th}}$  and  $j^{\text{th}}$  sites energy and their difference in different molecular pairs of the studied molecular solids.

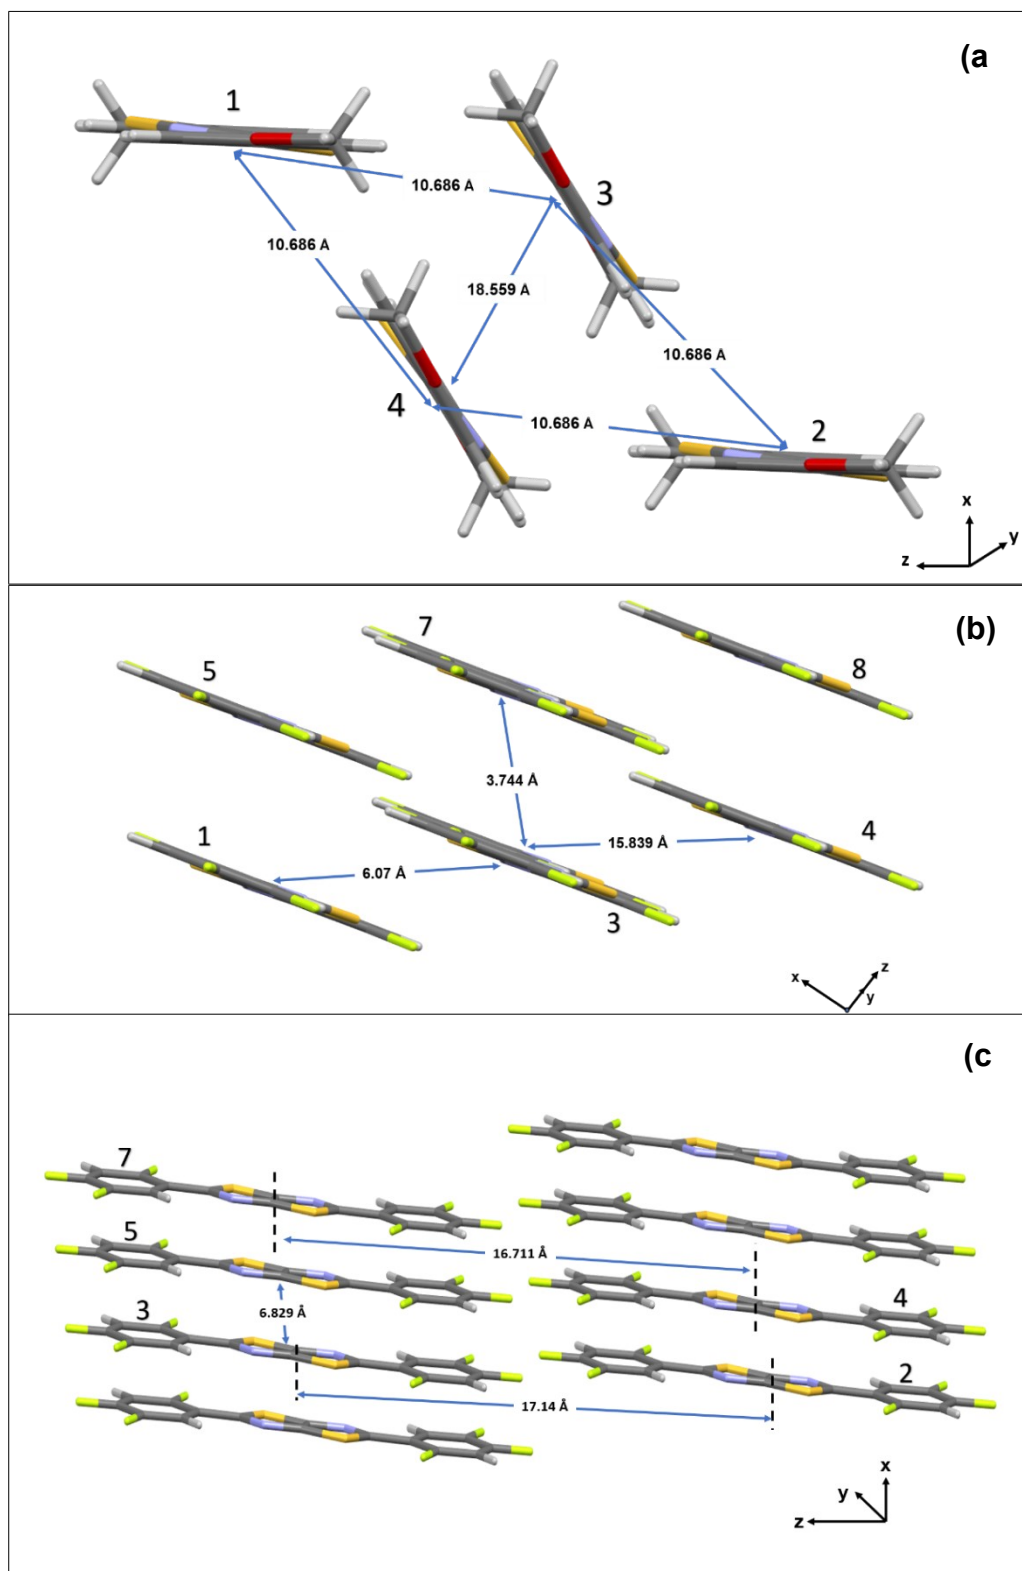

**Fig. S7** Crystal structure with possible charge transport pathways and their intermolecular distances of molecular crystal MOP-TZTZ (a) and molecular crystal TFP-TZTZ in x-y plane view (b) and long molecular axis view (c)

| MOP-TZTZ |                                       |                          |                       |                          |                       |                          |                       |                          |                       |                          |                       |
|----------|---------------------------------------|--------------------------|-----------------------|--------------------------|-----------------------|--------------------------|-----------------------|--------------------------|-----------------------|--------------------------|-----------------------|
| Charge   | Assigned site energy difference (meV) | Pair 13                  |                       | Pair 14                  |                       | Pair 23                  |                       | Pair 24                  |                       | Pair 34                  |                       |
|          |                                       | $W$ ( $10^9$ s $^{-1}$ ) | $t_d$ ( $10^{-10}$ s) | $W$ ( $10^9$ s $^{-1}$ ) | $t_d$ ( $10^{-10}$ s) | $W$ ( $10^9$ s $^{-1}$ ) | $t_d$ ( $10^{-10}$ s) | $W$ ( $10^9$ s $^{-1}$ ) | $t_d$ ( $10^{-10}$ s) | $W$ ( $10^9$ s $^{-1}$ ) | $t_d$ ( $10^{-10}$ s) |
| Hole     | 0                                     | 1.326                    | 7.52                  | 1.347                    | 7.40                  | 1.352                    | 7.37                  | 1.318                    | 7.56                  | 4.044                    | 2.46                  |
|          | 15                                    | 1.762                    | 5.66                  | 1.790                    | 5.57                  | 1.797                    | 5.55                  | 1.752                    | 5.69                  | 5.374                    | 1.85                  |
|          | 30                                    | 2.315                    | 4.30                  | 2.352                    | 4.24                  | 2.361                    | 4.22                  | 2.301                    | 4.33                  | 7.061                    | 1.41                  |
|          | 45                                    | 3.008                    | 3.31                  | 3.056                    | 3.26                  | 3.066                    | 3.25                  | 2.990                    | 3.33                  | 9.172                    | 1.09                  |
|          | 60                                    | 3.863                    | 2.58                  | 3.924                    | 2.54                  | 3.938                    | 2.53                  | 3.839                    | 2.60                  | 11.778                   | 0.85                  |
|          | 75                                    | 4.904                    | 2.03                  | 4.982                    | 2.00                  | 5.000                    | 1.99                  | 4.874                    | 2.04                  | 14.954                   | 0.67                  |
|          | 90                                    | 6.156                    | 1.62                  | 6.254                    | 1.59                  | 6.276                    | 1.59                  | 6.118                    | 1.63                  | 18.771                   | 0.53                  |

**Table S3** Calculated rate coefficient and drift time for hole transport at different electric field-assisted site energy gap values in different molecular pairs of MOP-TZTZ.

| MOP-TZTZ |                                       |                             |                       |                             |                       |                             |                       |                             |                       |                             |                       |
|----------|---------------------------------------|-----------------------------|-----------------------|-----------------------------|-----------------------|-----------------------------|-----------------------|-----------------------------|-----------------------|-----------------------------|-----------------------|
| Charge   | Assigned site energy difference (meV) | Pair 13                     |                       | Pair 14                     |                       | Pair 23                     |                       | Pair 24                     |                       | Pair 34                     |                       |
|          |                                       | $W$ ( $10^{10}$ s $^{-1}$ ) | $t_d$ ( $10^{-11}$ s) | $W$ ( $10^{10}$ s $^{-1}$ ) | $t_d$ ( $10^{-11}$ s) | $W$ ( $10^{10}$ s $^{-1}$ ) | $t_d$ ( $10^{-11}$ s) | $W$ ( $10^{10}$ s $^{-1}$ ) | $t_d$ ( $10^{-11}$ s) | $W$ ( $10^{10}$ s $^{-1}$ ) | $t_d$ ( $10^{-10}$ s) |
| Electron | 0                                     | 2.834                       | 3.52                  | 2.883                       | 3.46                  | 2.860                       | 3.49                  | 2.841                       | 3.51                  | 0.139                       | 7.19                  |
|          | 15                                    | 3.761                       | 2.65                  | 3.826                       | 2.61                  | 3.795                       | 2.63                  | 3.769                       | 2.64                  | 0.184                       | 5.42                  |
|          | 30                                    | 4.919                       | 2.03                  | 5.004                       | 1.99                  | 4.963                       | 2.01                  | 4.930                       | 2.02                  | 0.241                       | 4.14                  |
|          | 45                                    | 6.341                       | 1.57                  | 6.450                       | 1.55                  | 6.398                       | 1.56                  | 6.355                       | 1.57                  | 0.310                       | 3.21                  |
|          | 60                                    | 8.057                       | 1.24                  | 8.196                       | 1.22                  | 8.129                       | 1.23                  | 8.075                       | 1.23                  | 0.394                       | 2.53                  |
|          | 75                                    | 10.090                      | 0.99                  | 10.264                      | 0.97                  | 10.180                      | 0.98                  | 10.113                      | 0.99                  | 0.493                       | 2.02                  |
|          | 90                                    | 12.455                      | 0.80                  | 12.670                      | 0.79                  | 12.566                      | 0.79                  | 12.483                      | 0.80                  | 0.609                       | 1.64                  |

**Table S4** Calculated rate coefficient and drift time for electron transport at different electric field-assisted site energy gap values in different molecular pairs of MOP-TZTZ.

| TFP-TZTZ |                                       |                          |                       |                          |                       |                          |                       |                          |                       |                          |                       |                          |                      |
|----------|---------------------------------------|--------------------------|-----------------------|--------------------------|-----------------------|--------------------------|-----------------------|--------------------------|-----------------------|--------------------------|-----------------------|--------------------------|----------------------|
| Charge   | Assigned site energy difference (meV) | Pair 13                  |                       | Pair 23                  |                       | Pair 34                  |                       | Pair 35                  |                       | Pair 37                  |                       | Pair 47                  |                      |
|          |                                       | $W$ ( $10^9$ s $^{-1}$ ) | $t_d$ ( $10^{-11}$ s) | $W$ ( $10^9$ s $^{-1}$ ) | $t_d$ ( $10^{-10}$ s) | $W$ ( $10^9$ s $^{-1}$ ) | $t_d$ ( $10^{-12}$ s) | $W$ ( $10^9$ s $^{-1}$ ) | $t_d$ ( $10^{-10}$ s) | $W$ ( $10^9$ s $^{-1}$ ) | $t_d$ ( $10^{-13}$ s) | $W$ ( $10^9$ s $^{-1}$ ) | $t_d$ ( $10^{-9}$ s) |
| Hole     | 0                                     | 8.630                    | 11.55                 | 0.829                    | 12.02                 | 57.594                   | 17.31                 | 0.976                    | 10.22                 | 2375.65                  | 4.20                  | 0.580                    | 17.18                |
|          | 15                                    | 11.465                   | 8.69                  | 1.101                    | 9.05                  | 76.513                   | 13.03                 | 1.296                    | 7.69                  | 3156.01                  | 3.16                  | 0.771                    | 12.93                |
|          | 30                                    | 15.047                   | 6.62                  | 1.445                    | 6.90                  | 100.418                  | 9.93                  | 1.701                    | 5.86                  | 4142.05                  | 2.41                  | 1.012                    | 9.85                 |
|          | 45                                    | 19.510                   | 5.11                  | 1.874                    | 5.32                  | 130.200                  | 7.66                  | 2.206                    | 4.52                  | 5370.51                  | 1.86                  | 1.312                    | 7.60                 |
|          | 60                                    | 24.990                   | 3.99                  | 2.401                    | 4.15                  | 166.775                  | 5.98                  | 2.825                    | 3.53                  | 6879.18                  | 1.45                  | 1.680                    | 5.93                 |
|          | 75                                    | 31.624                   | 3.15                  | 3.038                    | 3.28                  | 211.045                  | 4.72                  | 3.575                    | 2.79                  | 8705.23                  | 1.14                  | 2.126                    | 4.69                 |
|          | 90                                    | 39.535                   | 2.52                  | 3.798                    | 2.62                  | 263.840                  | 3.78                  | 4.470                    | 2.23                  | 10882.92                 | 0.92                  | 2.658                    | 3.75                 |

**Table S5** Calculated rate coefficient and drift time for hole transport at different electric field-assisted site energy gap values in different molecular pairs of TFP-TZTZ.

| TFP-TZTZ |                                       |                             |                       |                             |                      |                             |                       |                             |                       |                             |                       |                             |                       |
|----------|---------------------------------------|-----------------------------|-----------------------|-----------------------------|----------------------|-----------------------------|-----------------------|-----------------------------|-----------------------|-----------------------------|-----------------------|-----------------------------|-----------------------|
| Charge   | Assigned site energy difference (meV) | Pair 13                     |                       | Pair 23                     |                      | Pair 34                     |                       | Pair 35                     |                       | Pair 37                     |                       | Pair 47                     |                       |
|          |                                       | $W$ ( $10^{10}$ s $^{-1}$ ) | $t_d$ ( $10^{-11}$ s) | $W$ ( $10^{10}$ s $^{-1}$ ) | $t_d$ ( $10^{-9}$ s) | $W$ ( $10^{10}$ s $^{-1}$ ) | $t_d$ ( $10^{-11}$ s) | $W$ ( $10^{10}$ s $^{-1}$ ) | $t_d$ ( $10^{-11}$ s) | $W$ ( $10^{10}$ s $^{-1}$ ) | $t_d$ ( $10^{-12}$ s) | $W$ ( $10^{10}$ s $^{-1}$ ) | $t_d$ ( $10^{-10}$ s) |
| Electron | 0                                     | 16.746                      | 11.55                 | 0.006                       | 15.41                | 0.501                       | 19.90                 | 0.349                       | 28.56                 | 26.575                      | 3.75                  | 0.062                       | 16.18                 |
|          | 15                                    | 22.230                      | 8.69                  | 0.009                       | 11.61                | 0.665                       | 14.99                 | 0.463                       | 21.51                 | 35.277                      | 2.83                  | 0.082                       | 12.19                 |
|          | 30                                    | 29.107                      | 6.62                  | 0.011                       | 8.87                 | 0.870                       | 11.45                 | 0.607                       | 16.43                 | 46.190                      | 2.16                  | 0.107                       | 9.31                  |
|          | 45                                    | 37.593                      | 5.11                  | 0.015                       | 6.87                 | 1.124                       | 8.87                  | 0.783                       | 12.72                 | 59.656                      | 1.67                  | 0.138                       | 7.21                  |
|          | 60                                    | 47.892                      | 3.99                  | 0.018                       | 5.39                 | 1.432                       | 6.96                  | 0.998                       | 9.99                  | 75.999                      | 1.31                  | 0.176                       | 5.66                  |
|          | 75                                    | 60.181                      | 3.15                  | 0.023                       | 4.29                 | 1.800                       | 5.54                  | 1.254                       | 7.95                  | 95.501                      | 1.04                  | 0.221                       | 4.50                  |
|          | 90                                    | 74.593                      | 2.52                  | 0.029                       | 3.46                 | 2.231                       | 4.47                  | 1.555                       | 6.41                  | 118.372                     | 0.84                  | 0.274                       | 3.63                  |

**Table S6** Calculated rate coefficient and drift time for electron transport at different electric field-assisted site energy gap values in different molecular pairs of TFP-TZTZ.

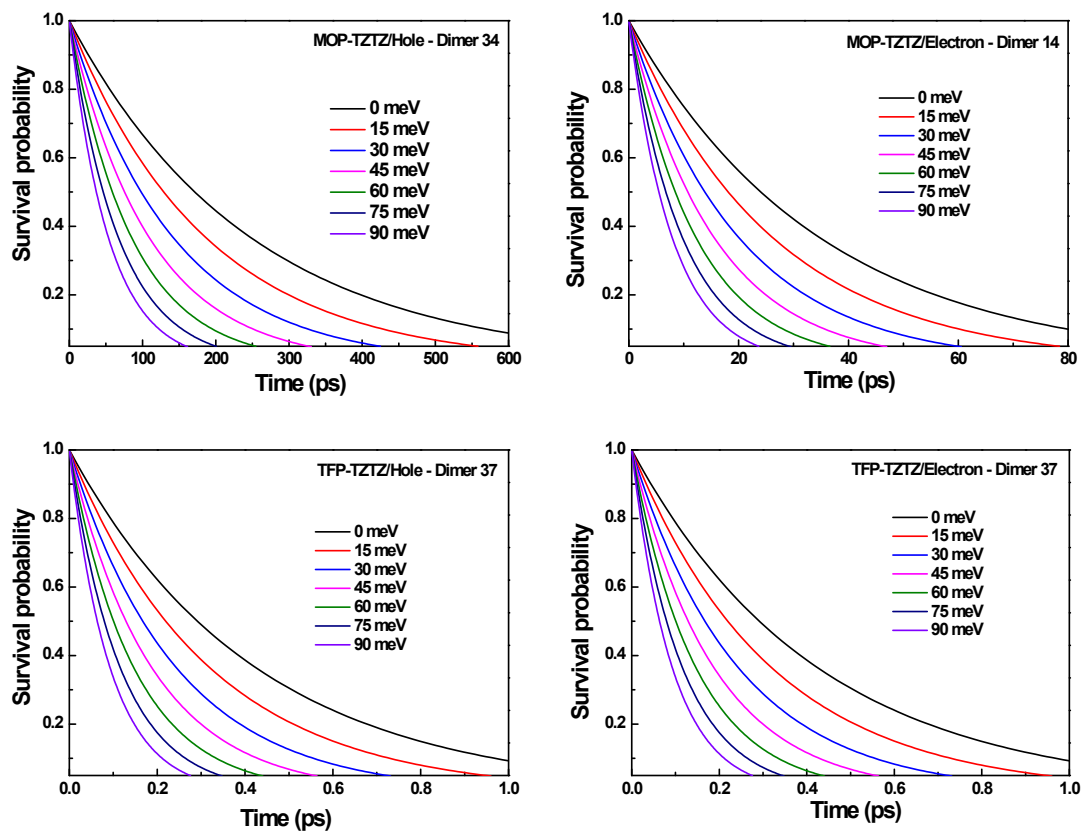

**Fig. S8** Survival probability analysis for hole and electron transport in different pairs (dimer) of the studied molecules at different electric field coupled site energy difference values.

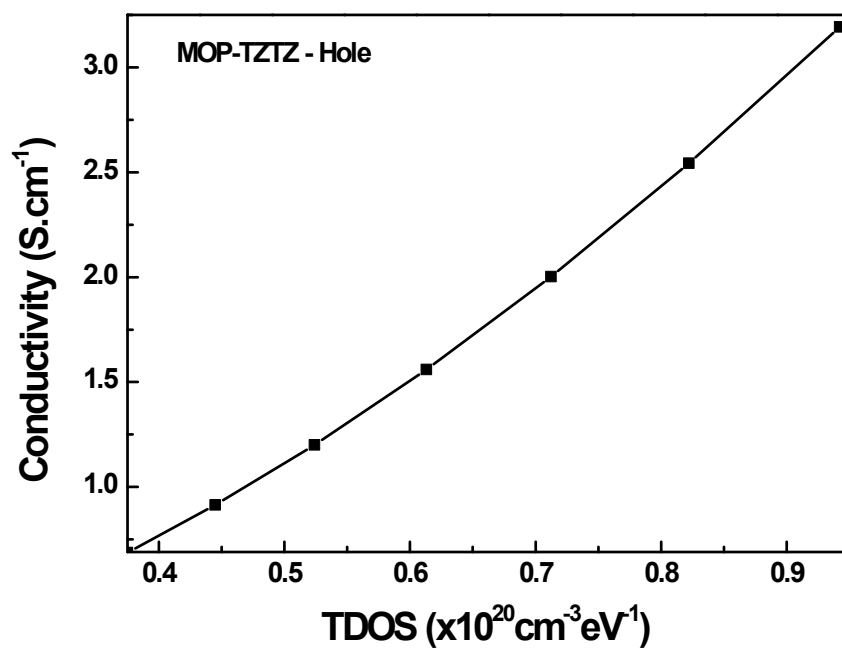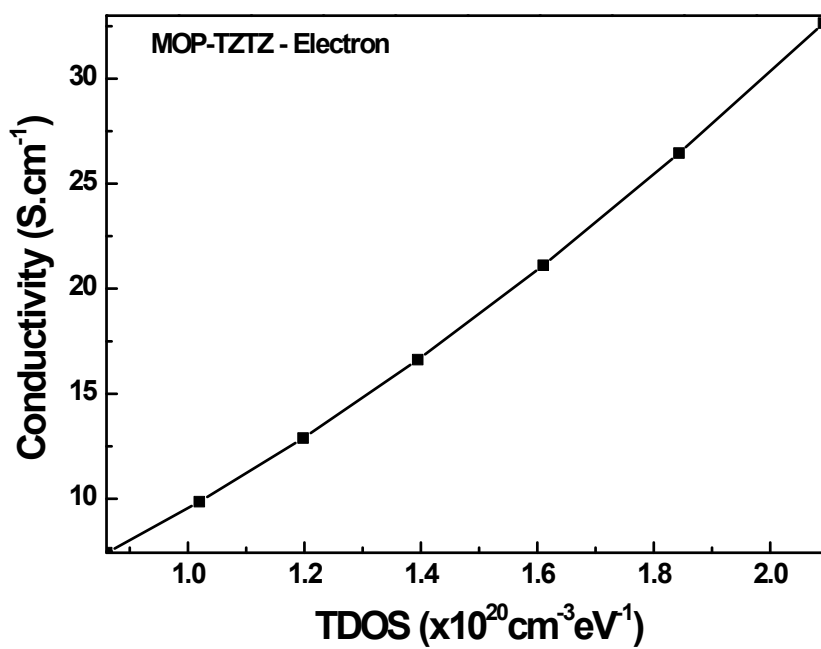

**Fig. S9** Plot of change in conductivity with respect to thermodynamic density of states (TDOS) for hole and electron transport in MOP-TZTZ.

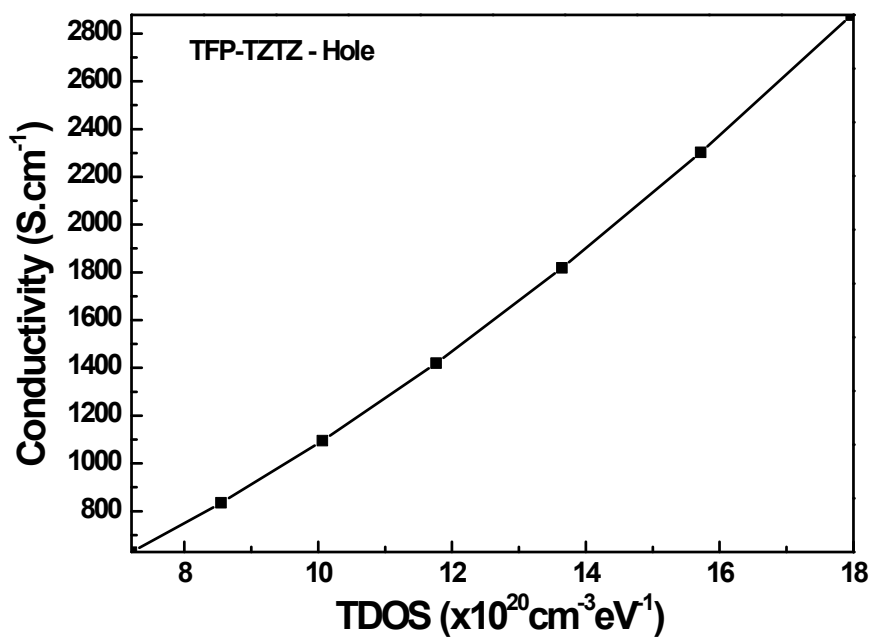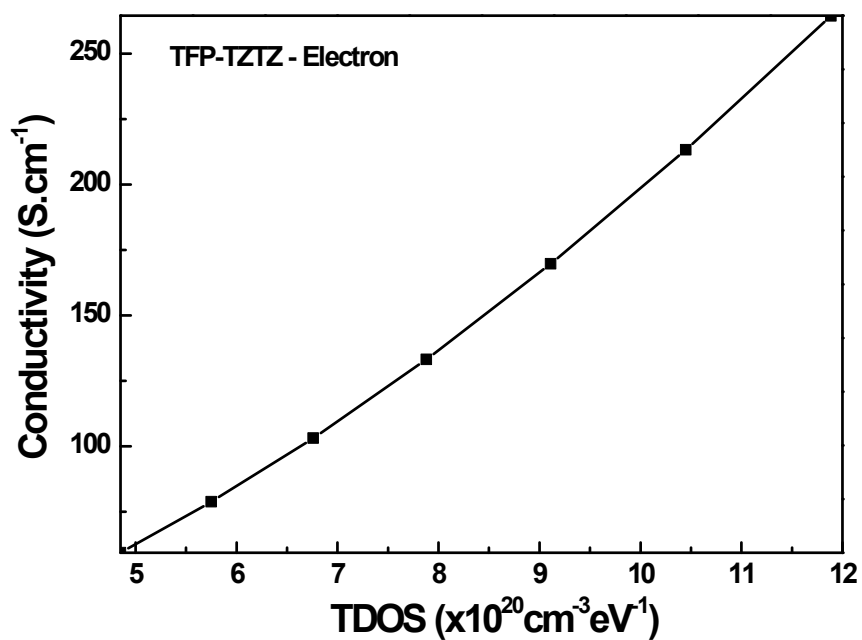

**Fig. S10** Plot of change in conductivity with respect to thermodynamic density of states (TDOS) for hole and electron transport in TFP-TZTZ.

| Molecule            | $\Delta\eta/\Delta h_s$ (meV) | Entropy-ruled $D/\mu$ ratio (mV) | Enhancement factor |
|---------------------|-------------------------------|----------------------------------|--------------------|
| MOP-TZTZ - Hole     | 48.22                         | 80.367                           | 3.103              |
| MOP-TZTZ -Electron  | 50.33                         | 83.883                           | 3.239              |
| TFP-TZTZ - Hole     | 48.72                         | 81.200                           | 3.135              |
| TFP-TZTZ - Electron | 49.8                          | 83                               | 3.205              |

**Table S7** Calculated  $\Delta\eta/\Delta h_s$  value, entropy-ruled  $D/\mu$  ratio, and enhancement factor for the studied molecular solids.

| Molecule             | $\Delta E_{ij}(\vec{E})$ (meV) | TDOS ( $\times 10^{20} \text{ cm}^3 \cdot \text{eV}^{-1}$ ) | Conductivity (S/cm) | Ideality factor |
|----------------------|--------------------------------|-------------------------------------------------------------|---------------------|-----------------|
| MOP-TZTZ<br>Hole     | 0                              | 0.375                                                       | 0.69                | 1.028           |
|                      | 15                             | 0.445                                                       | 0.91                |                 |
|                      | 30                             | 0.524                                                       | 1.20                |                 |
|                      | 45                             | 0.613                                                       | 1.56                |                 |
|                      | 60                             | 0.712                                                       | 2.00                |                 |
|                      | 75                             | 0.822                                                       | 2.54                |                 |
|                      | 90                             | 0.942                                                       | 3.19                |                 |
| MOP-TZTZ<br>Electron | 0                              | 0.860                                                       | 7.43                | 0.939           |
|                      | 15                             | 1.020                                                       | 9.86                |                 |
|                      | 30                             | 1.198                                                       | 12.89               |                 |
|                      | 45                             | 1.395                                                       | 16.62               |                 |
|                      | 60                             | 1.610                                                       | 21.12               |                 |
|                      | 75                             | 1.843                                                       | 26.45               |                 |
|                      | 90                             | 2.091                                                       | 32.65               |                 |
| TFP-TZTZ<br>Hole     | 0                              | 7.210                                                       | 628.09              | 1.001           |
|                      | 15                             | 8.550                                                       | 834.42              |                 |
|                      | 30                             | 10.065                                                      | 1095.09             |                 |
|                      | 45                             | 11.763                                                      | 1419.94             |                 |
|                      | 60                             | 13.646                                                      | 1818.68             |                 |
|                      | 75                             | 15.717                                                      | 2301.65             |                 |
|                      | 90                             | 17.969                                                      | 2877.36             |                 |
| TFP-TZTZ<br>Electron | 0                              | 4.851                                                       | 59.36               | 0.956           |
|                      | 15                             | 5.750                                                       | 78.79               |                 |
|                      | 30                             | 6.759                                                       | 103.17              |                 |
|                      | 45                             | 7.880                                                       | 133.24              |                 |
|                      | 60                             | 9.112                                                       | 169.75              |                 |
|                      | 75                             | 10.451                                                      | 213.30              |                 |
|                      | 90                             | 11.888                                                      | 264.39              |                 |

**Table S8** Different  $\Delta E(\vec{E})$  assisted TDOS, conductivity, and ideality factor for the studied molecular solids.



| Molecule | Pair | Intermolecular distance (Å) | Hole mobility (x10 <sup>-4</sup> cm <sup>2</sup> /Vs) | Electron mobility (x10 <sup>-2</sup> cm <sup>2</sup> /Vs) |
|----------|------|-----------------------------|-------------------------------------------------------|-----------------------------------------------------------|
| MOP-TZTZ | 13   | 10.69                       | 5.858                                                 | 1.252                                                     |
|          | 14   | 10.69                       | 5.951                                                 | 1.274                                                     |
|          | 23   | 10.69                       | 5.972                                                 | 1.263                                                     |
|          | 24   | 10.69                       | 5.822                                                 | 1.255                                                     |
|          | 34   | 18.56                       | 53.875                                                | 0.185                                                     |
| TFP-TZTZ | 13   | 6.07                        | 12.300                                                | 2.387                                                     |
|          | 23   | 17.14                       | 9.422                                                 | 0.007                                                     |
|          | 34   | 15.84                       | 558.976                                               | 0.486                                                     |
|          | 35   | 6.83                        | 1.761                                                 | 0.063                                                     |
|          | 37   | 3.74                        | 1288.132                                              | 1.441                                                     |
|          | 47   | 16.71                       | 6.267                                                 | 0.067                                                     |

**Table S9** For comparative study (for making comparison between the Entropy-ruled mobility and Einstein's mobility), the calculated hole and electron mobility using conventional Einstein's relation ( $\mu = qD/k_B T$ ) in different pairs of the studied molecular solids is presented.

| Molecule          | $\Delta E_{ij}(\vec{E})$ (meV) | Total current density between different pairs of MOP-TZTZ (mA/cm <sup>2</sup> ) |         |         |         |         |
|-------------------|--------------------------------|---------------------------------------------------------------------------------|---------|---------|---------|---------|
|                   |                                | Pair 13                                                                         | Pair 14 | Pair 23 | Pair 24 | Pair 34 |
| MOP-TZTZ/Hole     | 0                              | 63.23                                                                           | 63.23   | 63.23   | 63.23   | 109.81  |
|                   | 15                             | 77.90                                                                           | 77.90   | 77.90   | 77.90   | 135.29  |
|                   | 30                             | 94.84                                                                           | 94.84   | 94.84   | 94.84   | 164.70  |
|                   | 45                             | 114.20                                                                          | 114.20  | 114.20  | 114.20  | 198.34  |
|                   | 60                             | 136.16                                                                          | 136.16  | 136.16  | 136.16  | 236.46  |
|                   | 75                             | 160.84                                                                          | 160.84  | 160.84  | 160.84  | 279.33  |
|                   | 90                             | 188.36                                                                          | 188.36  | 188.36  | 188.36  | 327.12  |
| MOP-TZTZ/Electron | 0                              | 94.42                                                                           | 94.42   | 94.42   | 94.42   | 163.97  |
|                   | 15                             | 118.36                                                                          | 118.36  | 118.36  | 118.36  | 205.56  |
|                   | 30                             | 146.02                                                                          | 146.02  | 146.02  | 146.02  | 253.59  |
|                   | 45                             | 177.59                                                                          | 177.59  | 177.59  | 177.59  | 308.42  |
|                   | 60                             | 213.22                                                                          | 213.22  | 213.22  | 213.22  | 370.29  |
|                   | 75                             | 252.98                                                                          | 252.98  | 252.98  | 252.98  | 439.34  |
|                   | 90                             | 296.87                                                                          | 296.87  | 296.87  | 296.87  | 515.56  |

**Table S10** Calculated total current density for hole and electron transport in different pairs of MOP-TZTZ molecular solid.

| Molecule          | $\Delta E_{ij}(\vec{E})$ (meV) | Total current density between different pairs of TFP-TZTZ (mA/cm <sup>2</sup> ) |         |         |         |         |         |
|-------------------|--------------------------------|---------------------------------------------------------------------------------|---------|---------|---------|---------|---------|
|                   |                                | Pair 13                                                                         | Pair 23 | pair 34 | pair 35 | pair 37 | Pair 47 |
| TFP-TZTZ/Hole     | 0                              | 247.24                                                                          | 698.15  | 645.19  | 278.19  | 152.50  | 680.66  |
|                   | 15                             | 305.96                                                                          | 863.96  | 798.42  | 344.26  | 188.72  | 842.31  |
|                   | 30                             | 373.73                                                                          | 1055.34 | 975.28  | 420.52  | 230.52  | 1028.90 |
|                   | 45                             | 451.24                                                                          | 1274.19 | 1177.53 | 507.73  | 278.32  | 1242.27 |
|                   | 60                             | 538.98                                                                          | 1521.96 | 1406.50 | 606.46  | 332.45  | 1483.84 |
|                   | 75                             | 637.50                                                                          | 1800.17 | 1663.60 | 717.32  | 393.22  | 1755.07 |
|                   | 90                             | 747.05                                                                          | 2109.49 | 1949.46 | 840.58  | 460.78  | 2056.64 |
| TFP-TZTZ/Electron | 0                              | 175.62                                                                          | 495.91  | 458.29  | 197.61  | 108.32  | 483.49  |
|                   | 15                             | 219.26                                                                          | 619.14  | 572.17  | 246.71  | 135.24  | 603.63  |
|                   | 30                             | 269.66                                                                          | 761.45  | 703.68  | 303.42  | 166.32  | 742.37  |
|                   | 45                             | 327.22                                                                          | 923.99  | 853.89  | 368.18  | 201.83  | 900.84  |
|                   | 60                             | 392.26                                                                          | 1107.64 | 1023.61 | 441.36  | 241.94  | 1079.89 |
|                   | 75                             | 464.97                                                                          | 1312.97 | 1213.36 | 523.18  | 286.79  | 1280.07 |
|                   | 90                             | 545.45                                                                          | 1540.23 | 1423.38 | 613.74  | 336.44  | 1501.64 |

**Table S11** Calculated total current density for hole and electron transport in different pairs of TFP-TZTZ molecular solid.

| Molecule          | $\Delta E_{ij}(\vec{E})$ (meV) | lnJ     |         |         |         |         |
|-------------------|--------------------------------|---------|---------|---------|---------|---------|
|                   |                                | Pair 13 | Pair 14 | Pair 23 | Pair 24 | Pair 34 |
| MOP-TZTZ/Hole     | 0                              | 6.45    | 6.45    | 6.45    | 6.45    | 7.00    |
|                   | 15                             | 6.66    | 6.66    | 6.66    | 6.66    | 7.21    |
|                   | 30                             | 6.85    | 6.85    | 6.85    | 6.85    | 7.41    |
|                   | 45                             | 7.04    | 7.04    | 7.04    | 7.04    | 7.59    |
|                   | 60                             | 7.22    | 7.22    | 7.22    | 7.22    | 7.77    |
|                   | 75                             | 7.38    | 7.38    | 7.38    | 7.38    | 7.93    |
|                   | 90                             | 7.54    | 7.54    | 7.54    | 7.54    | 8.09    |
| MOP-TZTZ/Electron | 0                              | 6.85    | 6.85    | 6.85    | 6.85    | 7.40    |
|                   | 15                             | 7.08    | 7.08    | 7.08    | 7.08    | 7.63    |
|                   | 30                             | 7.29    | 7.29    | 7.29    | 7.29    | 7.84    |
|                   | 45                             | 7.48    | 7.48    | 7.48    | 7.48    | 8.03    |
|                   | 60                             | 7.66    | 7.66    | 7.66    | 7.66    | 8.22    |
|                   | 75                             | 7.84    | 7.84    | 7.84    | 7.84    | 8.39    |
|                   | 90                             | 8.00    | 8.00    | 8.00    | 8.00    | 8.55    |

**Table S12** Calculated logarithmic total current density values for hole and electron transport in different pairs of MOP-TZTZ molecular solid.

| Molecule          | $\Delta E_{ij}(\vec{E})$ (meV) | lnJ     |         |         |         |         |         |
|-------------------|--------------------------------|---------|---------|---------|---------|---------|---------|
|                   |                                | Pair 13 | Pair 23 | pair 34 | pair 35 | pair 37 | Pair 47 |
| TFP-TZTZ/Hole     | 0                              | 7.81    | 8.85    | 8.77    | 7.93    | 7.33    | 8.83    |
|                   | 15                             | 8.03    | 9.06    | 8.99    | 8.14    | 7.54    | 9.04    |
|                   | 30                             | 8.23    | 9.26    | 9.19    | 8.34    | 7.74    | 9.24    |
|                   | 45                             | 8.41    | 9.45    | 9.37    | 8.53    | 7.93    | 9.43    |
|                   | 60                             | 8.59    | 9.63    | 9.55    | 8.71    | 8.11    | 9.60    |
|                   | 75                             | 8.76    | 9.80    | 9.72    | 8.88    | 8.28    | 9.77    |
|                   | 90                             | 8.92    | 9.96    | 9.88    | 9.04    | 8.44    | 9.93    |
| TFP-TZTZ/Electron | 0                              | 7.47    | 8.51    | 8.43    | 7.59    | 6.99    | 8.48    |
|                   | 15                             | 7.69    | 8.73    | 8.65    | 7.81    | 7.21    | 8.71    |
|                   | 30                             | 7.90    | 8.94    | 8.86    | 8.02    | 7.42    | 8.91    |
|                   | 45                             | 8.09    | 9.13    | 9.05    | 8.21    | 7.61    | 9.11    |
|                   | 60                             | 8.27    | 9.31    | 9.23    | 8.39    | 7.79    | 9.29    |
|                   | 75                             | 8.44    | 9.48    | 9.40    | 8.56    | 7.96    | 9.46    |
|                   | 90                             | 8.60    | 9.64    | 9.56    | 8.72    | 8.12    | 9.62    |

**Table S13** Calculated logarithmic total current density values for hole and electron transport in different pairs of TFP-TZTZ molecular solid.
